# Supplementary material for: A theoretical insight on the anion⋯anion interactions observed in the solid state structure of a hetero-trinuclear complex
Source: Royal Society of Chemistry journal article supplement (doi:10.1039/d0ce01513j), 2021-01-01
Supplement: d0ce01513j1.pdf [file d0ce01513j1.pdf]

## Supporting information file for manuscript

### **A theoretical insight on the anion⋯anion interactions observed in the solid state structure of a hetero-trinuclear complex**

**Kousik Ghosh<sup>a</sup>, Antonio Frontera<sup>b,\*</sup> and Shouvik Chattopadhyay<sup>a,\*</sup>**

<sup>a</sup>*Department of Chemistry, Inorganic Section, Jadavpur University, Kolkata - 700032, India.*

*Tel: +913324572147 e-mail: [shouvik.chem@gmail.com](mailto:shouvik.chem@gmail.com)*

<sup>b</sup>*Departamento de Química, Universitat de les Illes Balears, Crta. de Valldemossa km 7.5, 07122 Palma (Balears), Spain.*

---

**Table S1.** CSD reference codes of structures showing  $I_3^- \cdots I_3^-$  interactions with  $I-I \cdots I \geq 150^\circ$

|        |        |          |        |        |                |          |
|--------|--------|----------|--------|--------|----------------|----------|
| KOZTIF | KUBCAO | WOVXUD   | AWEVON | BIKRAO | CUCGIQ         | DEGTIT   |
| GENFEK | GUFNEA | HIVYAP   | JOPLAD | KAMLUI | KAWDAQ01       | KAXPOR   |
| LAVXIR | LEKGUD | LESROT   | MESZAL | NASMID | NBAMTI12/12/13 | NOGDES   |
| OZUGUM | PAQMUS | PATVEM03 | PEKBEN | PIXFOU | PUXWEM         | QAHDAG   |
| RACNEO | RACNIS | SAKBUB   | SUPRIG | SUZFOI | TUVPUV         | VIFSIN   |
| VUVNIL | WEPTER | WIGLOO   | XUWPOU | YILMIP | YOCHOQ         | ZEPBAX01 |
| MUCVUE |        |          |        |        |                |          |

**Table S2:** CSD reference codes of structures showing  $I_3^- \cdots I_3^-$  interactions with  $I-I \cdots I < 150^\circ$

|        |        |        |        |        |        |         |        |
|--------|--------|--------|--------|--------|--------|---------|--------|
| AHEWUF | AHEWUF | CALHAY | CUPLAA | HAJDUT | PAYVIU | TIWF EK | UHANUM |
|--------|--------|--------|--------|--------|--------|---------|--------|
